# Supplementary material
Source: PubMed Central journal article supplement (PMC5427650)
Supplement: 10815_2017_892_MOESM1_ESM.pdf [file 10815_2017_892_MOESM1_ESM.pdf]

1 **Title**

2 In vitro fertilization for women infected by hepatitis C virus: a matched case control study and a systematic  
3 literature review

4

5

6 Journal of Assisted Reproduction and Genetics

7

8

9

10

11

12

13

14

15

16 **Caption:**

17 The response to ovarian stimulation was compared between women with a positive RT-PCR result for HCV and  
18 their matched negative controls (1-3) and is shown in table 7.

19

20

21

22

23

24

25

26

27

28

29 **Table 7: Response to ovarian stimulation: comparison between HCV RT-PCR positive women and their**  
 30 **matched negative controls (three controls per case).**

|                                 | <b>Controls N=51</b> |     | <b>HCV cases N=17</b> |     | <b>P-Value</b> |
|---------------------------------|----------------------|-----|-----------------------|-----|----------------|
| <b>Length Infertility (N)</b>   | 49                   |     | 15                    |     |                |
| median (min-max) (years)        | 3 (<1 to 16)         |     | 3 (1 to 14)           |     | 0.61           |
| <b>FSH day 3(N)</b>             | 40                   |     | 10                    |     |                |
| median (min-max)                | 6.0 (1.0 to 50.8)    |     | 8.3 (4.0 to 15.8)     |     | 0.11           |
| <b>PID (N)</b>                  | 25                   |     | 12                    |     |                |
|                                 | 7                    | 28% | 2                     | 17% | 0.69           |
| <b>Type of stimulation (N)</b>  | 49                   |     | 17                    |     |                |
| Long                            | 32                   | 65% | 11                    | 65% | 0.18           |
| Short                           | 10                   | 20% | 1                     | 6%  |                |
| Cetrotide® / Orgalutran®        | 7                    | 14% | 5                     | 29% |                |
| <b>E2 max median (min-max)</b>  | 1439 (5 to 7842)     |     | 1771 (70 to 4116)     |     | 0.77           |
| <b>Oocytes ≥ 15 at scan (N)</b> | 51                   |     | 16                    |     |                |
| median (min-max)                | 4 (0 to 21)          |     | 4 (1to 12)            |     | 0.94           |
| <b>Oocytes at retrieval (N)</b> | 38                   |     | 14                    |     |                |
| median (min-max)                | 5.5 (1 to 14)        |     | 5.5 (1 to 15)         |     | 0.93           |
| <b>Cycle cancellation</b>       |                      |     |                       |     | 0.52           |
| medical (not poor response)     | 2                    | 17% | 1                     | 33% |                |
| non-medical                     | /                    | /   | /                     | /   |                |
| poor response                   | 10                   | 83% | 2                     | 67% |                |

31

32 N is provided when some data are missing. FSH: Follicle Stimulating Hormone. PID: Pelvic Inflammatory Disease. E2 Max: is the peak value during stimulation.

33

34

35
