# Supplementary material
Source: PubMed Central journal article supplement (PMC5427650)
Supplement: 10815_2017_892_MOESM2_ESM.pdf [file 10815_2017_892_MOESM2_ESM.pdf]

1 **Title**

2 In vitro fertilization for women infected by hepatitis C virus: a matched case control study and a systematic  
3 literature review

4

5

6 Journal of Assisted Reproduction and Genetics

7

8

9

10

11

12

13

14

15

16 **Caption:**

17 To compare embryology and pregnancy results between patients sero-positive for HCV and control patients, the  
18 demographic data of cases and controls were matched (1-1) and are shown in table 8.

19

20

21

22

23

24

25

26

27

28

29

30

31 **Table 8: Pregnancy results after embryo transfer: principal demographic characteristics of HCV patients**  
 32 **and their matched control group (one control per case).**

|                                     | <b>Controls N=25</b>           |     | <b>HCV cases N=25</b> |     | <b>P-Value</b> |
|-------------------------------------|--------------------------------|-----|-----------------------|-----|----------------|
| <b>Months between cycles</b>        | Median 4.9 (< 0.2 to max 10.0) |     |                       |     |                |
| <b>Age mean <math>\pm</math>std</b> | 35.5 $\pm$ 4.3                 |     | 35.3 $\pm$ 4.4        |     | 0.92           |
| <b>Age median (min-max)</b>         | 36.2 (25.6 to 41.5)            |     | 35.7 (25.4 to 42.2)   |     |                |
| <b>Ethnical origin (N)</b>          | 23                             |     | 25                    |     |                |
| Caucasian                           | 58                             | 55% | 25                    | 52% | 0.25           |
| Sub-Saharan African                 | 12                             | 34% | 13                    | 36% |                |
| Maghrebian                          | 6                              | 10% | 9                     | 4%  |                |
| Asian                               | 4                              | 1%  | 1                     | 8%  |                |
| West Indian                         | 1                              | 4%  | 2                     | /   |                |
| <b>Female infertility etiology</b>  |                                |     |                       |     |                |
| Tubal                               | 14                             | 56% | 14                    | 56% | 1              |
| Hormonal                            | 2                              | 8%  | 2                     | 8%  | 1              |
| Idiopathic                          | 6                              | 24% | 6                     | 24% | 1              |
| Endometriosis                       | 3                              | 12% | 3                     | 12% | 1              |
| <b>Secondary infertility</b>        | 16                             | 64% | 17                    | 68% | 1              |
| <b>Male infertility etiology</b>    | 22                             | 88% | 20                    | 80% | 0.70           |
| <b>Extreme male factor</b>          | 2                              | 8%  | 2                     | 8%  | 1              |

33

34 Std: standard deviation. N is provided when some data are missing.

35

36
